CORRECTION

## Correction: Disposal practices of cigarettes and electronic nicotine products among adults, findings from Wave 6 (2021) of the PATH Study

Eva Sharma, Johanna Dubsy, Katherine V. Garcia-Rosales, Michael Halenar, Adam F. Benson, Alexander Maki, Andrea L. Ruybal, Aura Lee Morse, Michael D. Sawdey, Rudaina Alrefai-Kirkpatrick, Silvana Skara, Susana Addo Ntim, Hoshing W. Chang, Ther W. Aung, Heather L. Kimmel, Jennifer L. Pearson, Maansi Bansal-Travers, Kristie A. Taylor, Andrew Hyland, Thomas E. Novotny

The Data Availability statement for this article is incorrect. The correct statement is: Data are available in a public, open access repository. The data underlying this article are available through the United States Department of Health and Human Services. National Institutes of Health, National Institute on Drug Abuse, and United States Department of Health and Human Services. Food and Drug Administration. Center for Tobacco Products. Population Assessment of Tobacco and Health (PATH) Study [United States] Restricted-Use Files. Inter-university Consortium for Political and Social Research [distributor], 2021-06-29. The PATH Study data are available via download or application at <https://doi.org/10.3886/Series606>.

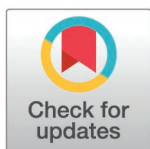

### Reference

1. Sharma E, Dubsy J, Garcia-Rosales KV, Halenar M, Benson AF, Maki A, et al. Disposal practices of cigarettes and electronic nicotine products among adults, findings from Wave 6 (2021) of the PATH Study. PLoS One. 2025;20(12):e0338007. <https://doi.org/10.1371/journal.pone.0338007> PMID: [41364653](https://pubmed.ncbi.nlm.nih.gov/41364653/)

### OPEN ACCESS

**Citation:** Sharma E, Dubsy J, Garcia-Rosales KV, Halenar M, Benson AF, Maki A, et al. (2026) Correction: Disposal practices of cigarettes and electronic nicotine products among adults, findings from Wave 6 (2021) of the PATH Study. PLoS One 21(3): e0344579. <https://doi.org/10.1371/journal.pone.0344579>

**Published:** March 6, 2026

**Copyright:** © 2026 Sharma et al. This is an open access article distributed under the terms of the [Creative Commons Attribution License](https://creativecommons.org/licenses/by/4.0/), which permits unrestricted use, distribution, and reproduction in any medium, provided the original author and source are credited.
